# Supplementary material
Source: PubMed Central journal article supplement (PMC4321900)
Supplement: NIHMS654459-supplement-Supp_Tables.pdf [file NIHMS654459-supplement-Supp_Tables.pdf]

**A**

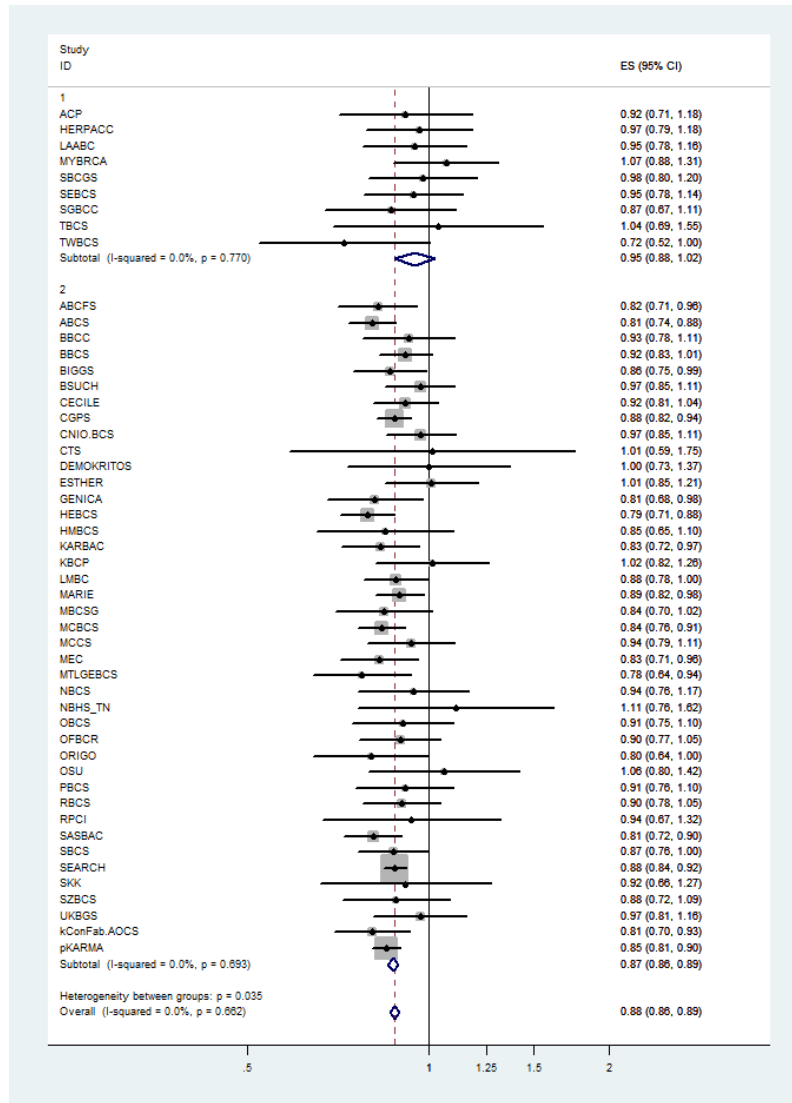

**B**

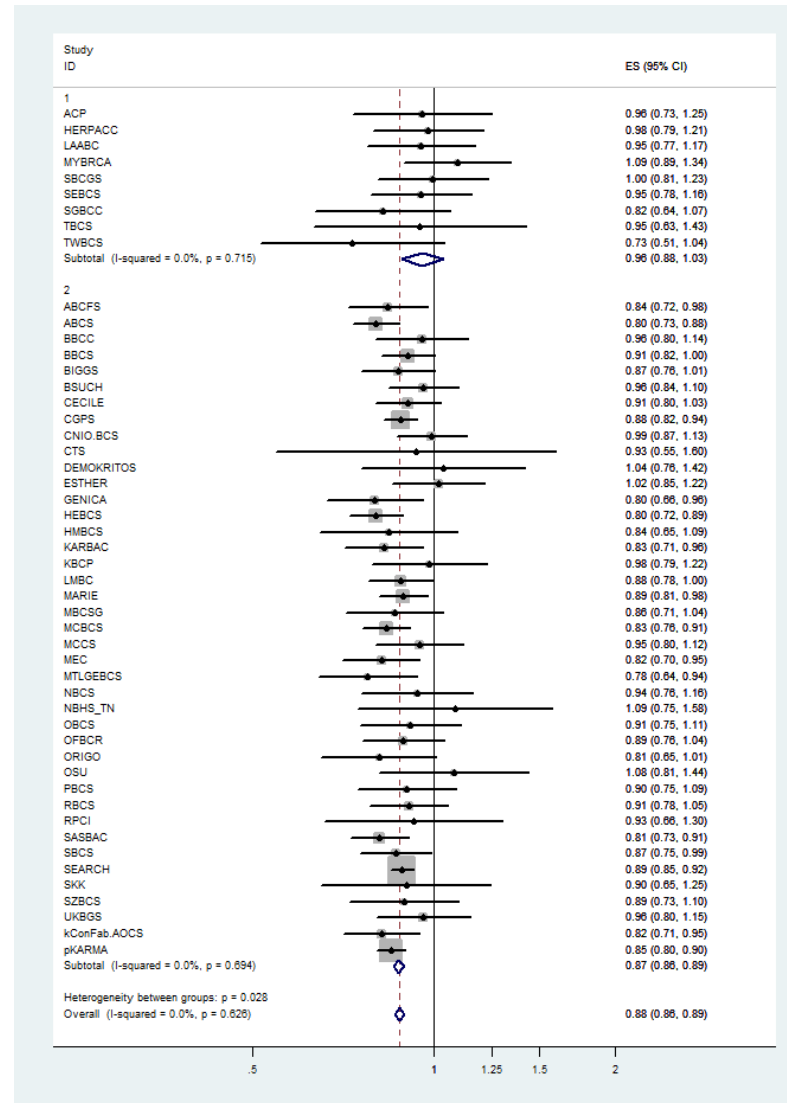

**Supplementary Figure 1.** Forest plot for (A) rs4442975 and (B) rs6721996 in ER+ breast cancer cases versus controls.

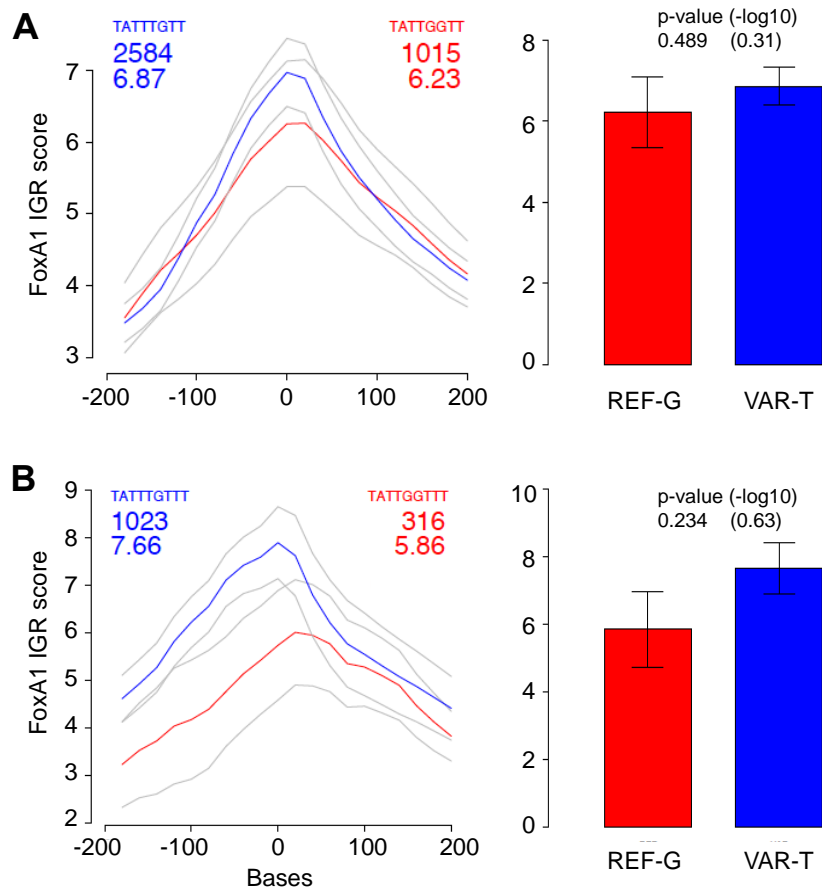

**Supplementary Figure 2. IGR profile plots for SNP rs4442975 showing the interaction effects for FOXA1 using eight (A) and nine (B) nucleotide models.** The top row of colored numbers shows the number of instances for each k-mer found genome wide within H3K4me2 elements in MCF7 cells. The bottom row shows the averaged binding intensities at the k-mers (50 bp window). Control profiles, shown in gray, are generated by scrambling the probed sequence. Bar graphs compare FOXA1 IGR scores between rs4442975 common alleles (REF-G) and minor alleles (VAR-T). The inset shows log10 of the p-values obtained by IGR. Error bars denote SEM (N=3)

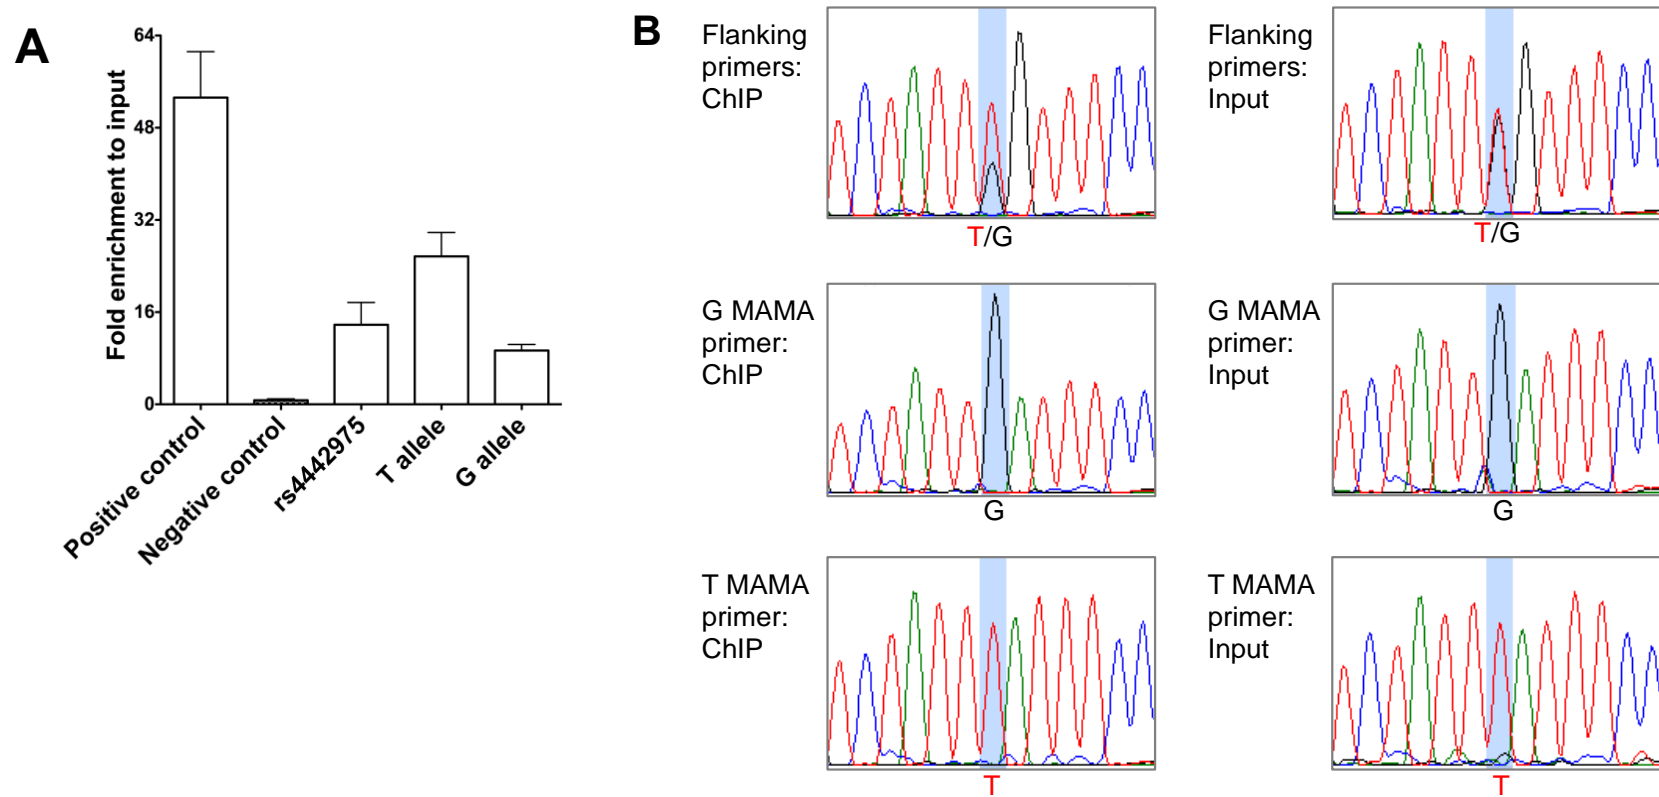

**Supplementary Figure 3. Allele-specific FOXA1 ChIP-qPCR at SNP rs4442975 in BT474 cells.** (A) ChIP-qPCR results against FOXA1 in BT474 breast cancer cells. Error bars denote SEM (N=3). (B) Sanger sequencing of PCR fragment generated using MAMA primers against the G or T allele of SNP rs4442975 or primers flanking this SNP following FOXA1 ChIP and their input DNA controls.

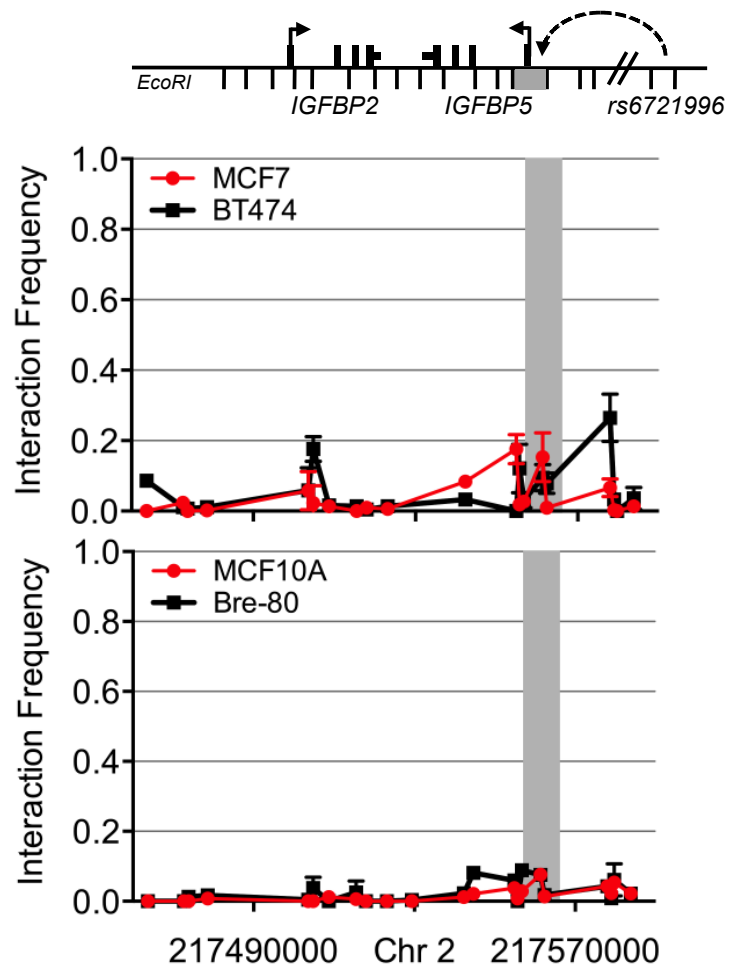

**Supplementary Figure 4. Long-range chromatin interactions between the 2q35 risk region and *IGFBP2* and *IGFBP5* in breast cell lines.** 3C interaction profiles between regions containing *rs6721996* and *IGFBP5* and *IGFBP2*. 3C libraries were generated with *EcoRI*, with the anchor point set at *rs6721996*. A physical map of the region interrogated by 3C is shown above, with grey bars representing the position of the *IGFBP5* promoter (not to scale). Error bars represent SD (N=2).

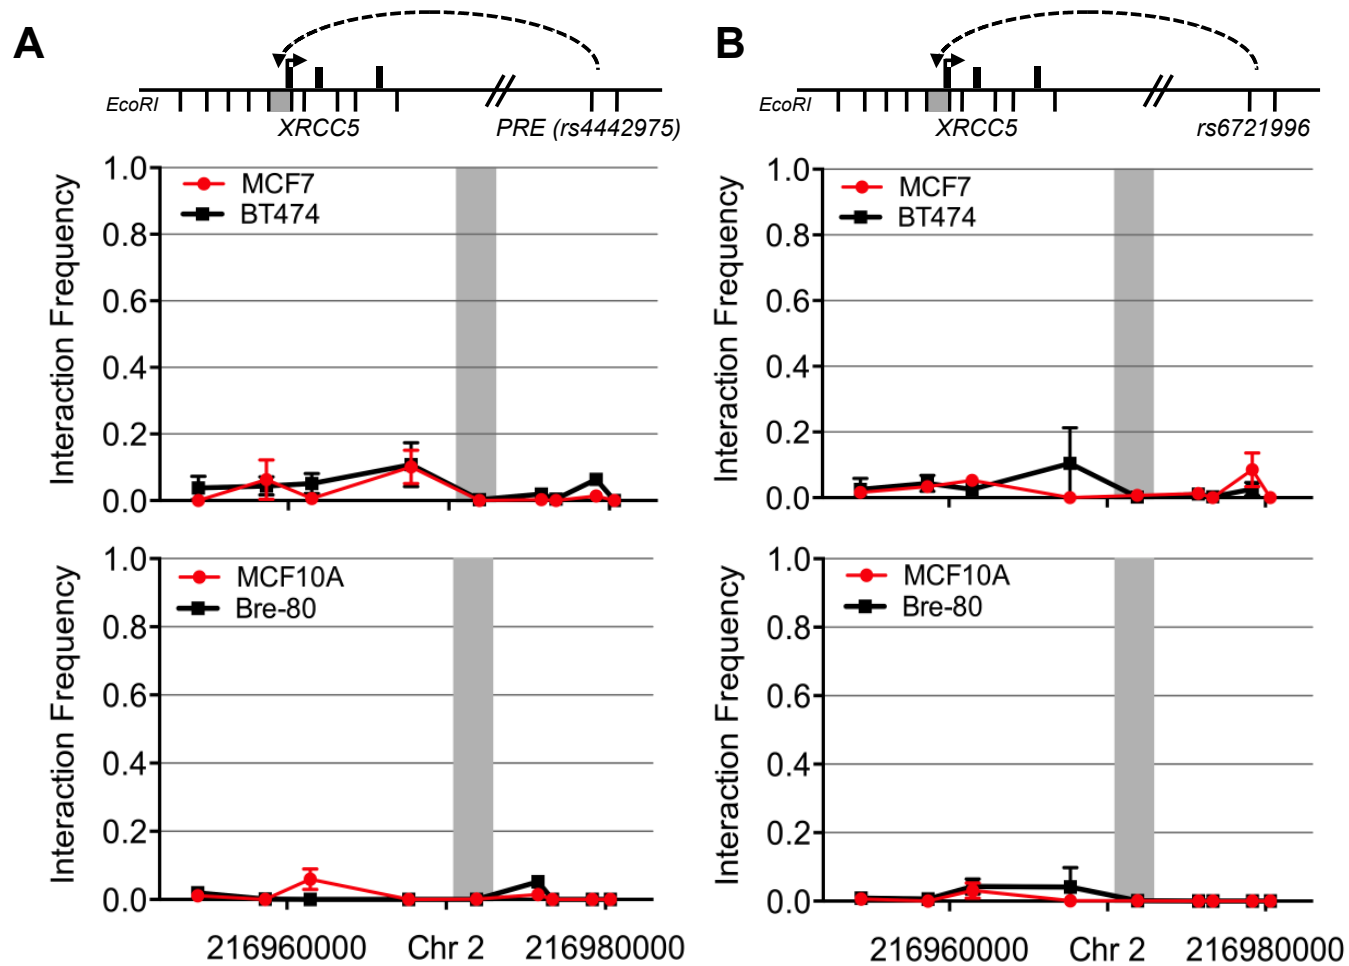

**Supplementary Figure 5. Long-range chromatin interactions between the 2q35 risk region and *XRCC5* in breast cell lines.** 3C interaction profiles between regions containing either (A) PRE (rs4442975) or (B) rs6721996 and *XRCC5*. 3C libraries were generated with *EcoRI*, with the anchor points set at the PRE (rs4442975) or rs6721996. A physical map of the region interrogated by 3C is shown above, with grey bars representing the position of the *XRCC5* promoter (not to scale). Error bars represent SD (N=2).



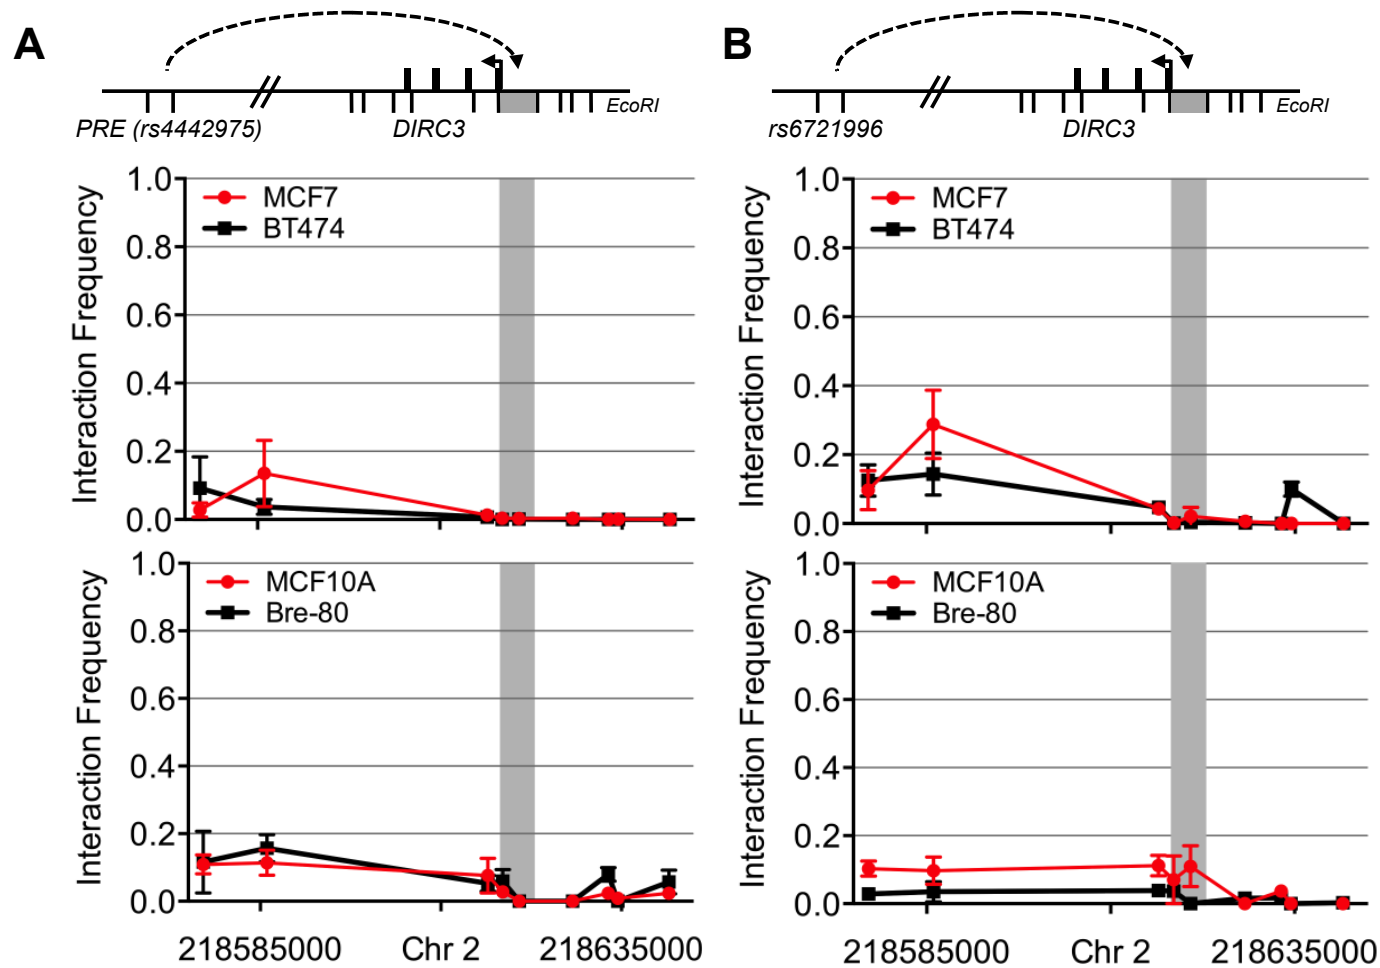

**Supplementary Figure 7. Long-range chromatin interactions between the 2q35 risk region and *DIRC3* in breast cell lines.** 3C interaction profiles between regions containing either (A) PRE (rs4442975) or (B) rs6721996 and the *DIRC3* promoter. 3C libraries were generated with *EcoRI*, with the anchor points set at the PRE (rs4442975) or rs6721996. A physical map of the region interrogated by 3C is shown above, with grey bars representing the position of the *DIRC3* promoter (not to scale). Error bars represent SD (N=2).

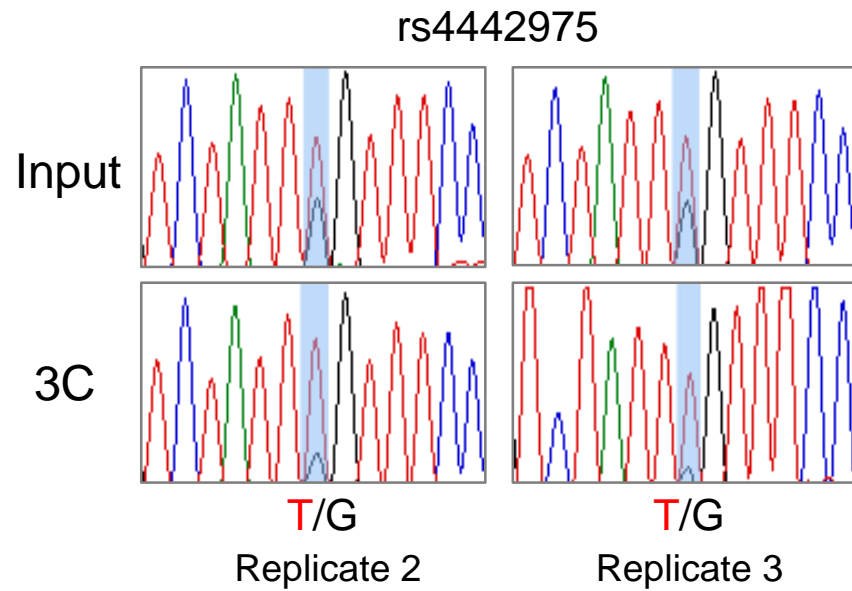

**Supplementary Figure 8. SNP rs4442975 affects chromatin looping between the PRE and *IGFBP5* promoter.** 3C followed by sequencing for the rs4442975-containing region in BT474 breast cancer cells shows allele-specific chromatin looping. Two of three independent 3C libraries are shown which were generated with *EcoRI*, primers used for 3C and sequencing can be found in **Supplementary Table 2**.



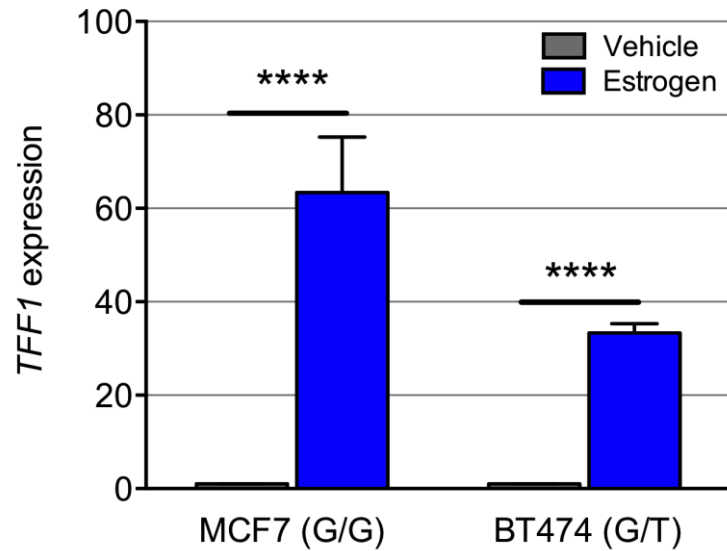

**Supplementary Figure 9. TaqMan qPCR assays confirming estrogen induction in MCF7 and BT474 cells.** MCF7 and BT474 cells were treated with either 10 nM estradiol or vehicle for 24 h. *TFF1* expression was measured by qPCR and normalised using *GUS* expression as an internal control. Error bars denote SEM (N=6). *P* values were determined with a two-tailed t test. \*\*\*\*  $p < 0.0001$ .

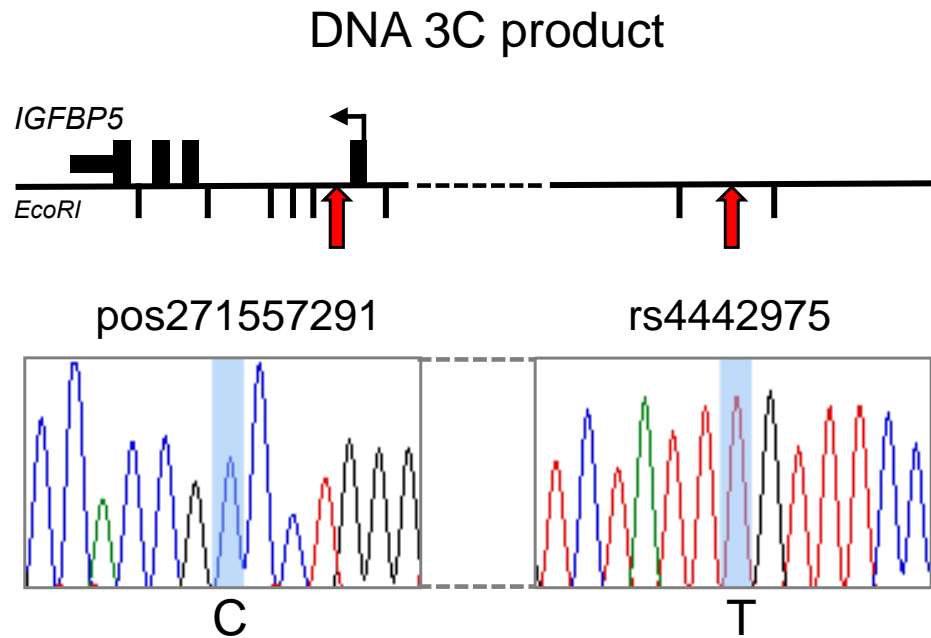

**Supplementary Figure 10. 3C sequencing results showing the physical interactions between heterozygous variants at the 2q35 enhancer and *IGFBP5*.** BT474 3C product was PCR amplified and Sanger sequenced, which showed the T allele of rs4442975 is physically linked to the C allele of pos271557291 (within *IGFBP5* intron 1).

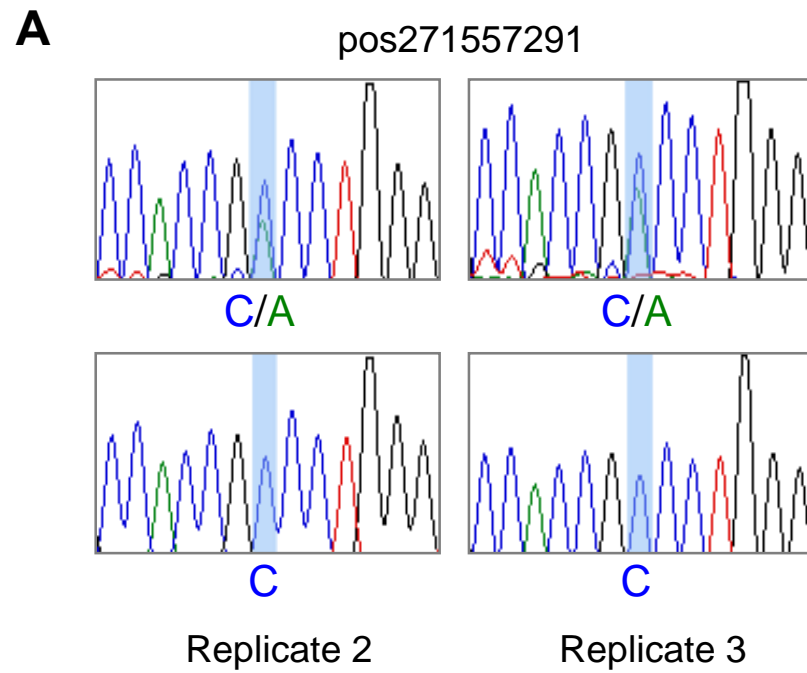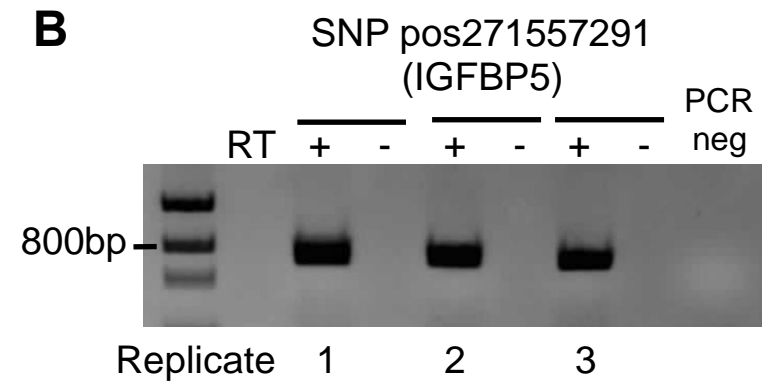

**Supplementary Figure 11.** (A) Replicates of Sanger sequencing result indicate DNA and RNA level on each alleles of SNP pos271557291. (B) Gel picture of PCR products of cDNAs generated from BT474 native RNA with or without reverse transcriptase.

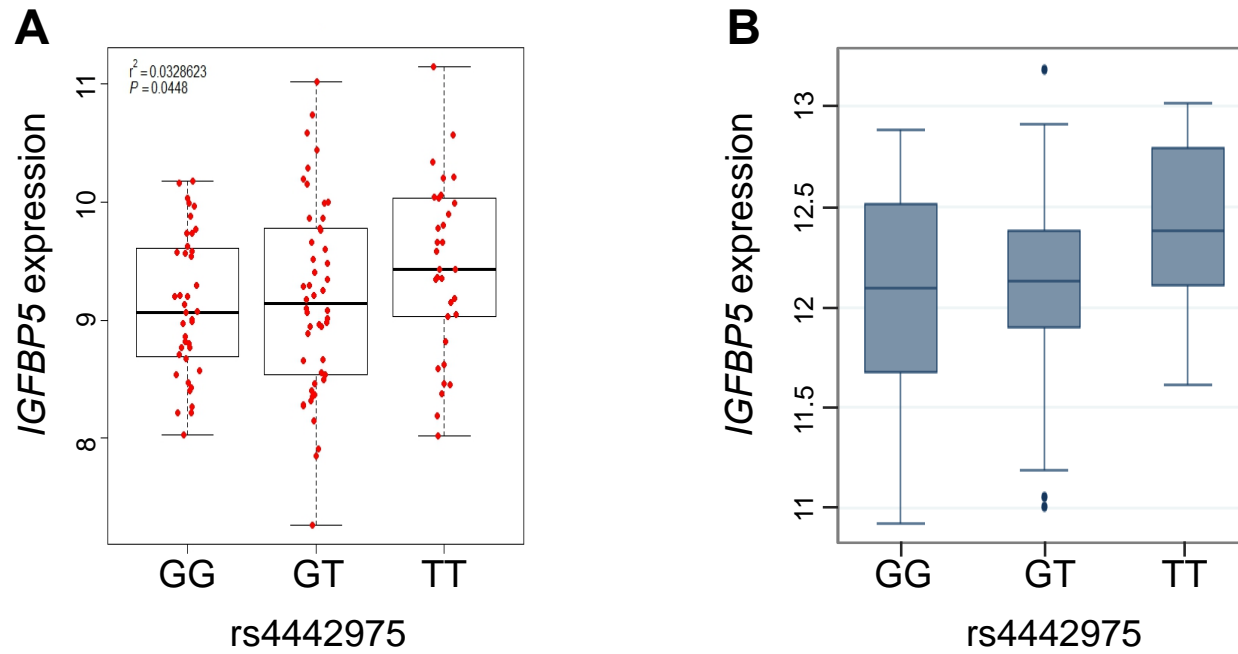

**Supplementary Figure 12. eQTL analysis and association of rs4442975 with *IGFBP5* in normal breast tissues. (A) NBCS dataset (N=123) and (B) METABRIC dataset (N=135). The x-axis of each plot corresponds to the three observed SNP genotypes and the y-axis represents log<sub>2</sub>-normalized gene expression values.**

| Haplotypes | rs4442975 | rs6721996 | rs13387042 | rs13412666 | rs13426489 | Haplotype frequency | OR                  | P-value                  |
|------------|-----------|-----------|------------|------------|------------|---------------------|---------------------|--------------------------|
| 1          | 2         | 2         | 1          | 1          | 1          | 0.014               | 0.84<br>[0.77-0.91] | 3.86 x 10 <sup>-5</sup>  |
| 2          | 2         | 2         | 2          | 2          | 2          | 0.469               | 0.87<br>[0.86-0.89] | 8.99 x 10 <sup>-44</sup> |
| 3          | 1         | 1         | 1          | 1          | 1          | 0.510               | -                   | -                        |
| All Others |           |           | Rare       |            |            | 0.007               | 1.02<br>[0.89-1.16] | 0.799                    |

**Supplementary Table 1. Haplotype analysis across the BCAC studies.** Each haplotype was compared to the ancestral haplotype carrying the common alleles of all 5 SNPs (haplotype 3). SNPs rs4442975 and rs6721996 are almost perfectly correlated with each other.

| Probe ID                                                     | $\beta$ (effect size) of rs4442975 on probe levels | P-value for association of rs4442975 | Strongest eSNP at 2q35 with probe | P-value for association of strongest eSNP | R <sup>2</sup> between rs4442975 and strongest eSNP |
|--------------------------------------------------------------|----------------------------------------------------|--------------------------------------|-----------------------------------|-------------------------------------------|-----------------------------------------------------|
| <b>NBCS study (n=123 normal breast samples)</b>              |                                                    |                                      |                                   |                                           |                                                     |
| A-23_P154115                                                 | 0.19                                               | 0.045                                | rs2024488                         | 0.0007                                    | 0.00009                                             |
| A_23_P383009                                                 | 0.14                                               | 0.21                                 | rs6716223                         | 0.0002                                    | 0.0003                                              |
| A_23_P376497                                                 | 0.19                                               | 0.52                                 | rs207946                          | 0.004                                     | 0.001                                               |
| <b>METABRIC study (n=135 adjacent normal breast samples)</b> |                                                    |                                      |                                   |                                           |                                                     |
| Ilmn_1750324                                                 | 0.13                                               | 0.026                                | rs192116758                       | 0.0004                                    | 0.001                                               |
| Ilmn_2132982                                                 | 0.10                                               | 0.11                                 | rs149640588                       | 0.0004                                    | 0.001                                               |

**Supplementary Table 2.** Association of rs4442975 and the strongest eSNP at the 2q35 locus with *IGFBP5* in the NBCS and METABRIC studies.

| Gene            | Probe ID           | P-value for association with rs4442975 |
|-----------------|--------------------|----------------------------------------|
| <i>XRCC5</i>    | A_24_P345498       | 0.622                                  |
| <i>XRCC5</i>    | A_32_P221832       | 0.620                                  |
| <i>XRCC5</i>    | Ilmn_2105983       | 0.431                                  |
| <i>MARCH4</i>   | Ilmn_1789991       | 0.096                                  |
| <i>SMARCAL1</i> | Ilmn_1752111       | 0.623                                  |
| <i>RPL37A</i>   | Ilmn_2051519       | 0.316                                  |
| <i>IGFBP2</i>   | A_23_P119943       | 0.701                                  |
| <i>IGFBP2</i>   | Ilmn_1715193       | 0.962                                  |
| <i>TNPI1</i>    | A_23_P165504       | 0.061                                  |
| <i>TNPI1</i>    | Ilmn_2150797       | 0.646                                  |
| <i>DIRC3</i>    | No probe available | N/A                                    |
| <i>IL8RB</i>    | Ilmn_1680397       | 0.719                                  |
| <i>IL8RB</i>    | Ilmn_1691507       | 0.509                                  |

**Supplementary Table 3.** Association of rs4442975 with probes for additional 2q35 locus genes in the NBCS and METABRIC studies. (For comparison, locus SNP rs148028060 is an eQTL for *IL8RB* probes with  $P < 1 \times 10^{-25}$  in the METABRIC study.)

| <b>3C <i>Eco</i>RI primers</b> | <b><i>Eco</i>RI fragment<br/>(hg19 coordinates)</b> | <b>Sequence (5' to 3')</b>          |
|--------------------------------|-----------------------------------------------------|-------------------------------------|
| Bait rs4442975 (PRE)           | 217,916,637                                         | TGATCCCTGAACTGGGAGAAATGGGTGG        |
| Bait rs6721996                 | 217,909,071                                         | CAGCCTGGGAAGGGTTGGTACTTTCTCTACC     |
| Allele specific 3C FOR1        | 217,916,637                                         | TTAGCCCTGGAATTTTGGTGATGGGAGG        |
| Allele specific 3C FOR2        | 217,916,637                                         | GACGTCAAACCTGGCTATTGATTCTCTCCAAAAGG |
| Spanning <i>IGFBP5</i>         | 217,583,840                                         | CCAGAGAGAAGAAAGAGGAGTGCAGGACAGC     |
|                                | 217,579,734                                         | GGCTTCCCTAACCCCTCAGGCCCTCTGCC       |
|                                | 217,579,008                                         | CAAAGCTGACTTGCCTCAGAGATGCAAGC       |
|                                | 217,577,955                                         | CATAGGCATCCTCCATAATCCCGTATCCTGC     |
|                                | 217,562,357                                         | ACATGTGCTGTGTTGGTGTGCTAAGCAGC       |
|                                | 217,561,337                                         | TGTGATGTGGCTAGTGTGAAGGGTGTACACG     |
|                                | 217,556,731                                         | TGATGGGCTGGTCCCCAGCATAGATAACC       |
|                                | 217,555,682                                         | CCTGAGGGCTTGAGTTTTAAGTCAGAGCAGC     |
|                                | 217,554,866                                         | CCAGGTTAGGCCAGGTGTCCAAATGC          |
|                                | 217,542,270                                         | GGCTGTGAAGGGACATGAACTGATTTTCAGG     |
|                                | 217,523,181                                         | GACTCAAATCCCGTAGCCAGATCTGAACTCC     |
|                                | 217,517,970                                         | GGAGGGAGGCAGAAGTTAGGAAAGAGGAAGG     |
|                                | 217,515,465                                         | TCTTCCCTTTGACTTCCTGGCTCAGAGAGC      |
|                                | 217,508,733                                         | GGCACAGAAGCCAGTTCATAATAGGGTGAGG     |
|                                | 217,504,807                                         | GTGGTTGACTGGGCTTTGAGGGAAAGG         |
|                                | 217,503,575                                         | ATGGCTGGGTAGTCCACTATGTGCCAGC        |
|                                | 217,478,594                                         | ATGCTTCTTGACCATCAGGAATGGTGG         |
|                                | 217,473,840                                         | CCTGCCTGTGTCTCCCTTTCCCTTCGTATACC    |
|                                | 217,472,670                                         | TGGGAATAGAAGCTACGTCCTCAGAGATTCCC    |
|                                | 217,463,707                                         | CCTTCCCTGGCTACTGATGGAGTGCAGG        |
| Spanning <i>XRCC5</i>          | 216,954,397                                         | GAAATACTGGGTGAGAGGGCAGCAGAGG        |
|                                | 216,958,636                                         | TACTGCCACATGTACACCATTTGCCATCC       |
|                                | 216,961,479                                         | GAGGCTCTTCAAATTTGCTTTGAATGCTATGG    |
|                                | 216,967,651                                         | CTTCCATGGCACCACAGCCACTTTACC         |



|                       |             |                                     |
|-----------------------|-------------|-------------------------------------|
|                       | 216,971,899 | GAAACTGGGATGTGCATTTTACTGTTCTCAAAGG  |
|                       | 216,975,759 | CCAAGGACTCAGAATAATGGGTAGGAGAGATGG   |
|                       | 216,976,679 | ACTTCCGTTGGGCACTAGTACTTCCCACC       |
|                       | 216,979,167 | GGGCAAGATTACCTTGCCTTAAGATGGATGC     |
|                       | 216,980,318 | GTGCATGTACACATAACCTCTTGCCTGTCAGG    |
| Spanning <i>TNPI</i>  | 217,706,488 | GCAAGAATTAGTGGCAGCAAGGACAATTTAAGC   |
|                       | 217,709,110 | AAGTTGACACTGTCATCCTGGTGAGTAGATCAGC  |
|                       | 217,712,044 | CCTACCACCCTGGAGCAAGTCTCTCAAGC       |
|                       | 217,712,862 | GTTGAGAATGAAGCTACCTTCTGGTTCTGCTGG   |
|                       | 217,717,602 | GCGTATGCTCTAACTGCTGCCACAGAAGG       |
|                       | 217,733,066 | CCTTCTTCAACTCCATTGCTGGCTTGG         |
|                       | 217,736,813 | GTCAAGTGGGAGAAAGCACATGTGTCTGG       |
|                       | 217,746,063 | TAAGGTGTAAGCTCAGGGAGGCTCTGACCC      |
| Spanning <i>DIRC3</i> | 218,577,073 | CTCAGCAGGTCTGCTGTTTTCCAGGAGG        |
|                       | 218,585,922 | ATCCTGGGAAATGCTGCAACTCTACCAACC      |
|                       | 218,616,510 | CCACGTGCTTCATTCTAAGCATAGAGATCTTGC   |
|                       | 218,618,584 | TCTGGAGAGCTGATGAGTGTTATTGTAACCAGAGG |
|                       | 218,620,848 | AGTCTCAAGTCAATGGCCTCATCTTCCACC      |
|                       | 218,628,251 | CATCCAAATGGAAACACAGAGGTTAGAGAAATGC  |
|                       | 218,633,195 | GACTCGGAGTAGAGGGAAGGGTGTACTGTAATGG  |
|                       | 218,634,491 | TCTGATCAAATGCTCCCCAGAATGTATGG       |
|                       | 218,641,600 | GAAGGACAAATAGGGAGATGGAACTTTCATCC    |

| Luciferase Cloning Primers | Sequence (5' to 3')                        |
|----------------------------|--------------------------------------------|
| <i>IGFBP5</i> prom FOR     | <u>GGTACCAGT</u> GACAGAGAGGGAAGTGTCACTCC   |
| <i>IGFBP5</i> prom REV     | CTCGAGTCTTCGAAATTCGCAGGTTCTACG             |
| PRE FOR                    | <u>ACCGGT</u> TGATTTTCAGTTCCTTGTCTCTCCAGC  |
| PRE REV                    | <u>CCTGCAGGAGT</u> GTACAGGGACCAATCATCCTCC  |
| rs4442975 FOR              | GGTCACTAATATAGTCTATTTGTTTCCCAGG            |
| rs4442975 REV              | CCTGGGGAAACA <u>AA</u> ATAGACTATATTAGTGACC |

| <b>Allele Specific ChIP Primers</b>       | <b>Sequence (5' to 3')</b>     |
|-------------------------------------------|--------------------------------|
| <i>FOXAI</i> Positive Control FOR         | GAGCTGGCATTCTAGCGAAG           |
| <i>FOXAI</i> Positive Control REV         | CCCTCAAGCAGGGTTAGTCA           |
| <i>FOXAI</i> Negative Control FOR         | AACCTCGCTATGCTCCCTTC           |
| <i>FOXAI</i> Negative Control REV         | TGTGTGCCTTTCATCTGGAG           |
| rs4442975 FOR                             | CAGCCATGCCTGAACTTTTC           |
| rs4442975 REV                             | TCAGTCCTATTTGAGAAAAGGAGAA      |
| rs4442975_G_MAMA_REV                      | AGAACAAGCCTGGGGAAATC           |
| rs4442975_T_MAMA_REV                      | GAGAACAAGCCTGGGGAAATA          |
| <b>Allele Specific Expression Primers</b> | <b>Sequence (5' to 3')</b>     |
| IGFBP5 allele cDNA REV                    | TGCGTGTACACCCCTTCACACTAGC      |
| IGFBP5 allele PCR FOR                     | CAAACCTGGCTATTGATTCTCTCCAAAAGG |
| IGFBP5 allele PCR REV                     | TTGGTAAATAATAAGTGGAGCCAGGATGC  |

**Supplementary Table 4:** Oligonucleotides used in this study.
